# Supplementary material for: Are Viruses Taxonomic Units? – A Protein Domain and Loop-Centric Phylogenomic Assessment
Source: Preprints.org preprint supplement (doi:10.20944/preprints202406.0329.v1), 2024-06-06
Supplement: Supplementary file 1 [file supplementary]

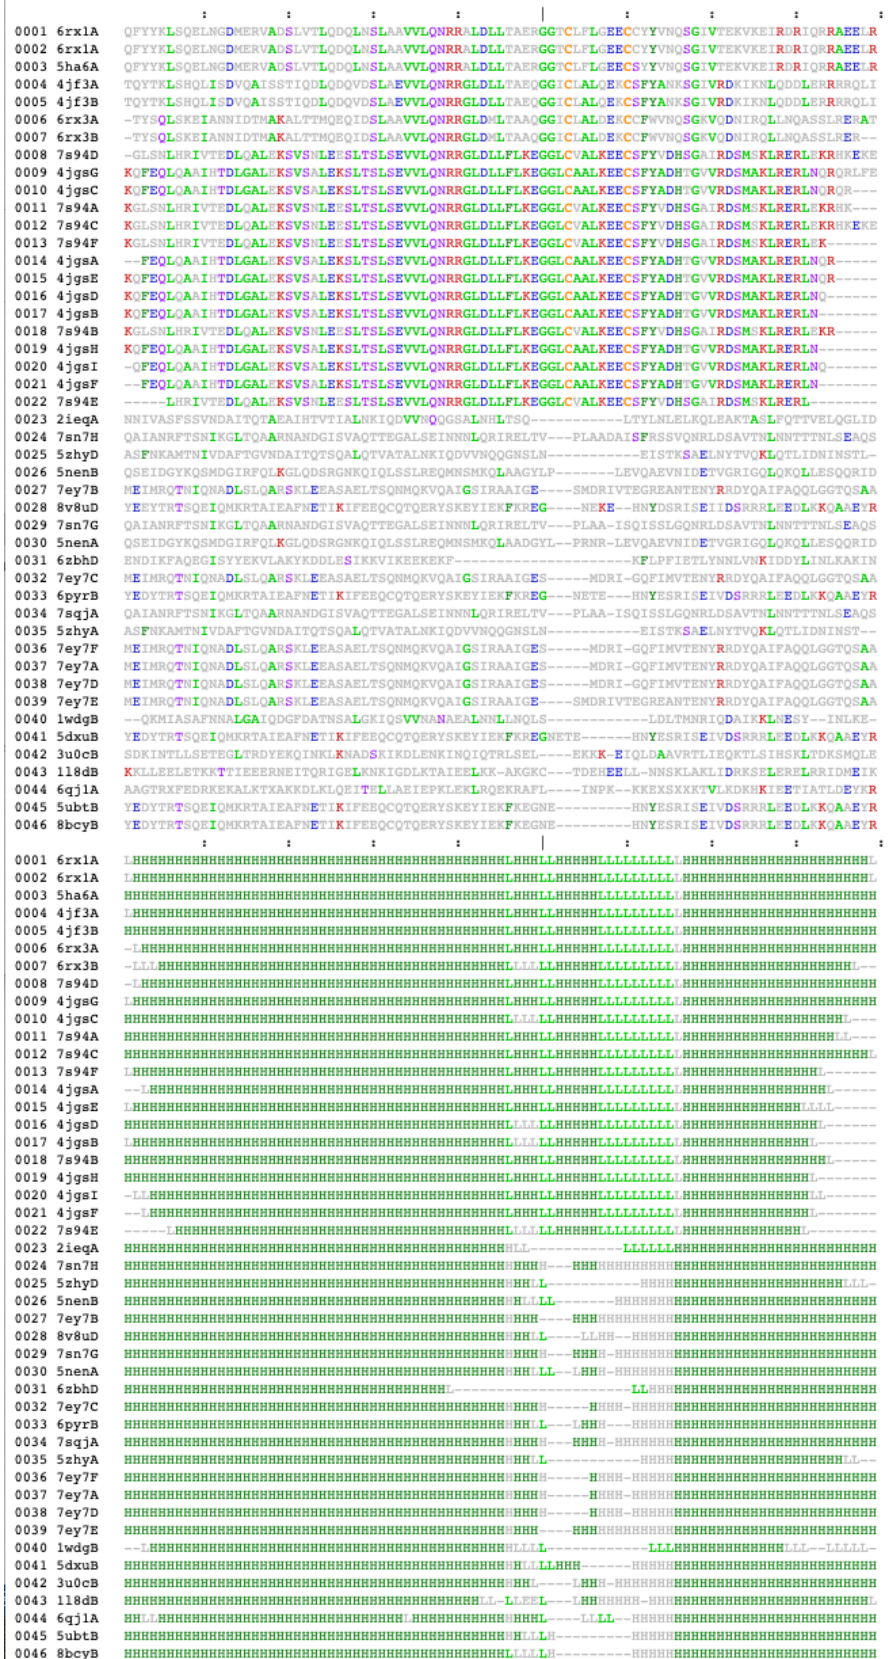

**Figure S1.** Sequence and structural alignment of top-ranked structures ( $Z > 7.5$ ). Uppercase letters describe structurally equivalent positions with 6rx1A. Lowercase letters describe insertions. The most frequent amino acid type is colored in each column. DSSP secondary structure assignments: H/h, helix; E/e, strand; L/l: coil.
